# Supplementary figures and images for: 2,2′-Bipyridines carrying a diazo moiety and their complexes with bis(hexafluoroacetylacetonato)copper: synthesis, structures, electronic and magnetic properties of their photoproducts in frozen solutions
Source: Royal Society of Chemistry journal article supplement (doi:10.1039/b007375j), 2001-01-01

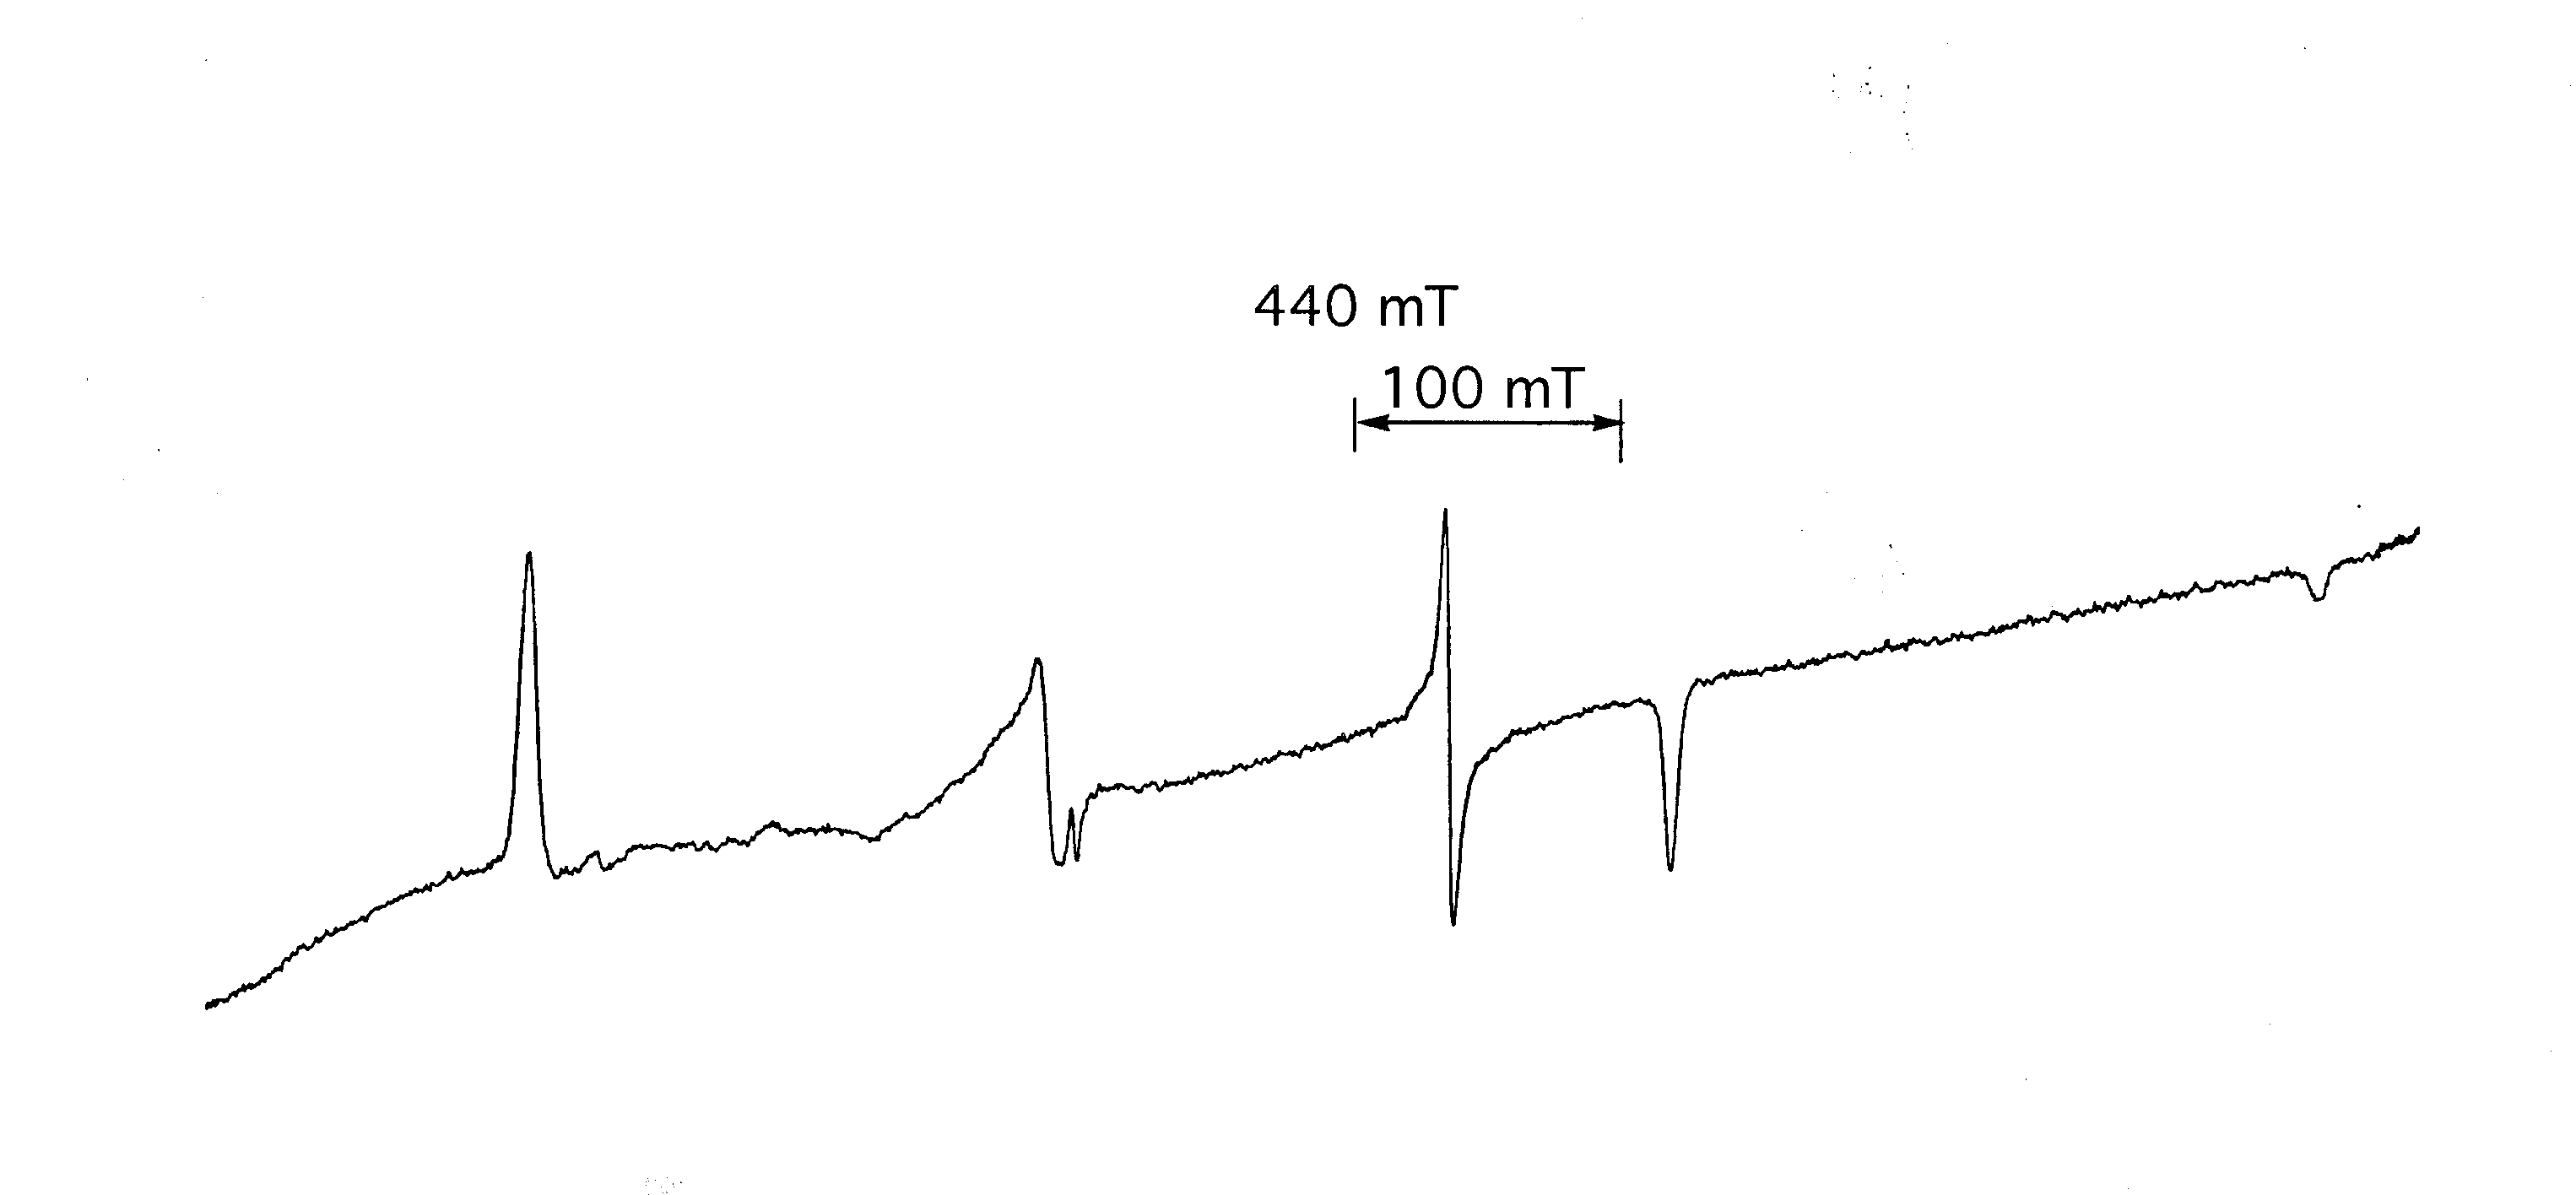

Supplement: b007375js2.doc [file b007375js2.doc]
